# Supplementary material
Source: HighWire-hosted journal article supplement (https://bmjopen.bmj.com/content/7/12/e017771)
Supplement: inline-supplementary-material-1 [file inline-supplementary-material-1.pdf]

**Appendix 1: AMD Awareness Questionnaire.**

No:

Postcode:

## **AMD Awareness Questionnaire**

Please circle the correct option

**1. Sex:**      Male              Female

**2. Age (years):**

**3. Educational Status:**

1) Completed Primary School

3) College Qualification

2) Completed Secondary  
School

4) University Degree

5) Prefer not to say

**4. Employment status:**

1) Unemployed

4) Retired

2) Full time

5) Other (specify):

3) Part time

6) Prefer not to say

**5. Prior to now, have you ever been told you have Age Related Macular Degeneration (AMD)?**

1) Yes

2) No

**\*IF 'Yes', MOVE ON TO QUESTION 7\***

**6. If no, have you ever heard of Age Related Macular Degeneration (AMD)?**

1) Yes

2) N

**7. If you have heard of AMD, can you describe the condition and its symptoms?**

---

---

**8. Regardless of whether or not you are familiar with AMD, which of the following factors do you think increases the risk of developing AMD?  
(select all that apply)**

- |                       |                                     |
|-----------------------|-------------------------------------|
| 1) Smoking            | 4) Unprotected exposure to sunlight |
| 2) Vitamin deficiency | 5) Genetics                         |
| 3) Age                | 6) Sex                              |

**9. Do you currently smoke?**

- |        |       |
|--------|-------|
| 1) Yes | 2) No |
|--------|-------|

**10. Is AMD a treatable condition?**

- |        |       |
|--------|-------|
| 1) Yes | 2) No |
|--------|-------|

**11. If yes, do you know what treatments are available?**

---

---

**12. If you were worried about your eyesight, where would you go for advice?**

- |                    |                     |
|--------------------|---------------------|
| 1) Ophthalmologist | 4) Optician         |
| 2) GP              | 5) Other (specify): |
| 3) Pharmacist      |                     |
