# Supplementary material
Source: HighWire-hosted journal article supplement (https://bmjopen.bmj.com/content/7/12/e017771)
Supplement: inline-supplementary-material-2 [file inline-supplementary-material-2.pdf]

**Appendix 2:** Power calculation for AMD awareness survey sample size.

| <b>Sample Size: X-Sectional, Cohort, &amp; Randomized Clinical Trials</b> |               |               |                       |
|---------------------------------------------------------------------------|---------------|---------------|-----------------------|
| Two-sided significance level(1-alpha):                                    |               |               | 95                    |
| Power(1-beta, % chance of detecting):                                     |               |               | 80                    |
| Ratio of sample size, Unexposed/Exposed:                                  |               |               | 1                     |
| Percent of Exposed with Outcome:                                          |               |               | 25                    |
| Odds Ratio:                                                               |               |               | 6.3                   |
| Risk/Prevalence Ratio:                                                    |               |               | 5                     |
| Risk/Prevalence difference:                                               |               |               | 20                    |
|                                                                           | <b>Kelsey</b> | <b>Fleiss</b> | <b>Fleiss with CC</b> |
| Sample Size - Exposed                                                     | 51            | 49            | 59                    |
| Sample Size-Nonexposed                                                    | 51            | 49            | 59                    |
| Total sample size:                                                        | 102           | 98            | 118                   |

**References**

Kelsey et al., Methods in Observational Epidemiology 2nd Edition, Table 12-15  
 Fleiss, Statistical Methods for Rates and Proportions, formulas 3.18 & 3.19  
 CC = continuity correction

Based on a global survey investigating AMD awareness by AMD Alliance International, the level of awareness in the UK was 16% in 2005.<sup>38</sup> Allowing for increase in awareness over time (demonstrated by studies in other countries), hence assuming a slightly higher level of awareness (~25%) in south-east Scotland, we would have a power of 80% to detect this with a total sample size of 118 patients.

**Appendix 3:** Table comparing summary demographic data for included vs excluded case notes.

| <b>Patient demographics</b>                               | <b>Analysed (n = 195)</b> | <b>Excluded (n = 120)</b> |
|-----------------------------------------------------------|---------------------------|---------------------------|
| Sex (% female)                                            | 61.5                      | 58.3                      |
| Mean age (years)                                          | 77.7                      | 78.4                      |
| Percentage of patients presenting with first affected eye | 95.9%                     | 97.5%                     |

**Appendix 4:** Table showing breakdown of case notes excluded from study.

|                                                                                     |            |
|-------------------------------------------------------------------------------------|------------|
| <b>Total case notes identified</b>                                                  | <b>315</b> |
| Co-existence of ocular comorbidities that give rise to choroidal neovascularization | 23         |
| Symptom duration not recorded                                                       | 76         |
| Lost to follow-up                                                                   | 21         |
| <b>Case notes included in study</b>                                                 | <b>195</b> |
